# Supplementary material
Source: PubMed Central journal article supplement (PMC2864595)
Supplement: NIHMS195517-supplement-1_si_001.pdf [file NIHMS195517-supplement-1_si_001.pdf]

## **Oxygen Activation at Mononuclear Nonheme Iron Centers: A Superoxo Perspective.**

Anusree Mukherjee<sup>†</sup>, Matthew A. Cranswick<sup>†</sup>, Mrinmoy Chakraborti<sup>¶</sup>, Tapan K. Paine<sup>†#</sup>,  
Kiyoshi Fujisawa<sup>||</sup>, Eckard Münck<sup>¶</sup> and Lawrence Que, Jr. <sup>†\*</sup>

<sup>†</sup>Department of Chemistry and Center for Metals in Biocatalysis, University of Minnesota,

207 Pleasant St. SE, Minneapolis, MN 55455

<sup>||</sup>Department of Chemistry, Graduate School of Pure and Applied Sciences, University of Tsukuba, Tsukuba 305-8571, Japan

<sup>¶</sup>Department of Chemistry, Carnegie Mellon University, 4400 Fifth Avenue, Pittsburgh, PA 15213

<sup>#</sup> Current Address: Department of Inorganic Chemistry, Indian Association for the Cultivation of Science, 2A&2B Raja S. C. Mullick Road, Jadavpur, Kolkata-700032, India.

Corresponding author: [larryque@umn.edu](mailto:larryque@umn.edu)

**Table S1.** Summary of Crystallographic Data for **1**·3CH<sub>2</sub>Cl<sub>2</sub> and **2**·C<sub>5</sub>H<sub>12</sub>

|                            | <b>1</b> ·3CH <sub>2</sub> Cl <sub>2</sub>                                         | <b>2</b> ·C <sub>5</sub> H <sub>12</sub>                                                       |
|----------------------------|------------------------------------------------------------------------------------|------------------------------------------------------------------------------------------------|
| Empirical Formula          | C <sub>34</sub> H <sub>59</sub> B Cl <sub>6</sub> Fe N <sub>6</sub> O <sub>4</sub> | C <sub>75</sub> H <sub>114</sub> B <sub>2</sub> Fe <sub>2</sub> N <sub>12</sub> O <sub>6</sub> |
| fw                         | 895.23                                                                             | 1413.10                                                                                        |
| <i>T</i> (K)               | 173(2)                                                                             | 173(2)                                                                                         |
| Mo Kα λ, Å                 | 0.71073                                                                            | 0.71073                                                                                        |
| space group                | P-1                                                                                | P2/c                                                                                           |
| <i>a</i> (Å)               | 12.549(3)                                                                          | 11.3474(10)                                                                                    |
| <i>b</i> (Å)               | 13.537(3)                                                                          | 13.0436(11)                                                                                    |
| <i>c</i> (Å)               | 13.733(3)                                                                          | 26.760(2)                                                                                      |
| α (deg)                    | 88.421(3)                                                                          | 90°                                                                                            |
| β (deg)                    | 89.132(3)                                                                          | 97.690(1)°                                                                                     |
| γ (deg)                    | 80.386(3)                                                                          | 90°                                                                                            |
| <i>V</i> (Å <sup>3</sup> ) | 2299.2(10) Å <sup>3</sup>                                                          | 3925.1(6)                                                                                      |
| <i>Z</i>                   | 2                                                                                  | 2                                                                                              |
| R1 <sup>a</sup>            | 0.0473                                                                             | 0.0416                                                                                         |
| wR2 <sup>b</sup>           | 0.1358                                                                             | 0.1100                                                                                         |

$$^a R_1 = \sum |F_o| - |F_c| / \sum |F_o|; \quad ^b wR2 = [\sum [w(F_o^2 - F_c^2)^2] / \sum [w(F_o^2)^2]]^{1/2}$$

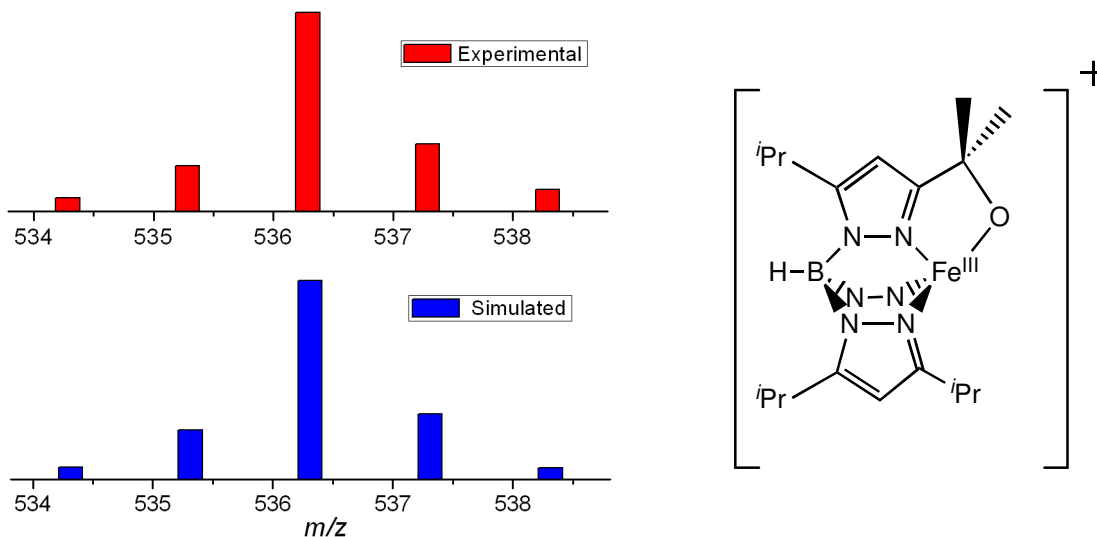

**Figure S1 :** ESI-MS spectrum when MeCN solution of **1** or **2** (1 mM) is exposed to oxygen at room temperature. The peak at  $m/z = 536$ , matches with the formula  $[\text{Fe}(\text{Tp}^{\text{iPr}_2*})]^+$  as schematically described at right.

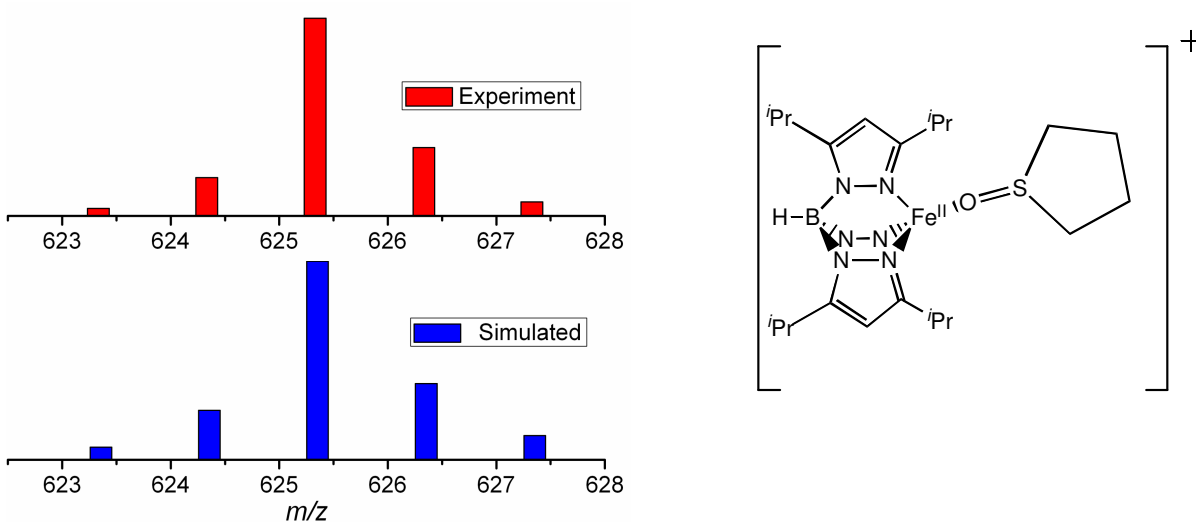

**Figure S2 :** ESI-MS spectrum, when MeCN solution of **1** or **2** (1 mM) is exposed to oxygen at room temperature in the presence of tetrahydrothiophene (100 mM). The peak at  $m/z = 625$ , matches with the formula  $[\text{Fe}(\text{Tp}^{\text{iPr}_2})(\text{OS}(\text{CH}_2)_4)]^+$  as schematically described at right.

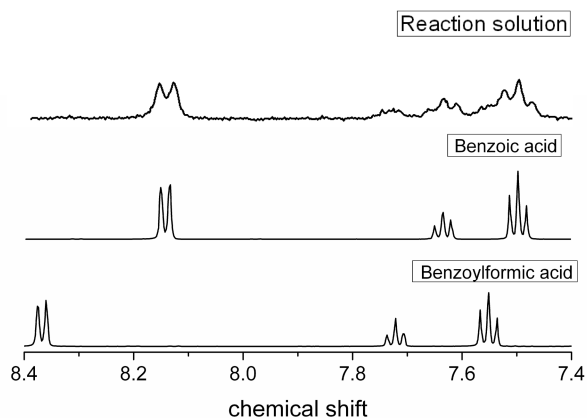

**Figure S3** :  $^1\text{H}$ -NMR spectrum (300MHz,  $\text{CDCl}_3$  at  $25^\circ\text{C}$ ) of the organic product after reaction of **2** with  $\text{O}_2$ .

### Mössbauer Spectroscopy

We have analyzed the Mössbauer spectra of the green diiron(III) peroxo intermediate using the spin Hamiltonian ( $S_1 = S_2 = 5/2$ )

$$\hat{\mathcal{H}} = J\hat{S}_1 \cdot \hat{S}_2 + \sum_{i=1,2} \left\{ 2\beta\hat{S}_i \cdot \hat{\mathbf{B}} + A_o\hat{S}_i \cdot \hat{\mathbf{I}}_i - g_n\beta_n\hat{\mathbf{B}} \cdot \hat{\mathbf{I}}_i + \hat{\mathcal{H}}_{Q,i} \right\}$$

$$\hat{\mathcal{H}}_{Q,i} = \frac{1}{12} eQV_{i,zz} \left[ 3\hat{I}_{i,z}^2 - I(I+1) + \eta_i (\hat{I}_{i,x}^2 - \hat{I}_{i,y}^2) \right]$$

where all symbols have their conventional meanings. For the analysis of the antiferromagnetically coupled peroxo dimer the zero-field splitting terms of the  $\text{Fe}^{\text{III}}$  site do not matter and have been dropped. The simulations were performed by assuming the fast relaxation regime for the spin of the coupled system and by assuming two identical  $\text{Fe}^{\text{III}}$  sites. The simulations of Figure 6 were obtained with the following parameters:  $A_o/g_n\beta_n = -21$  T,  $\Delta E_Q = +1.32$  mm/s,  $\eta = 1$ ,  $\delta = 0.65$  mm/s and  $J = 70$   $\text{cm}^{-1}$ .

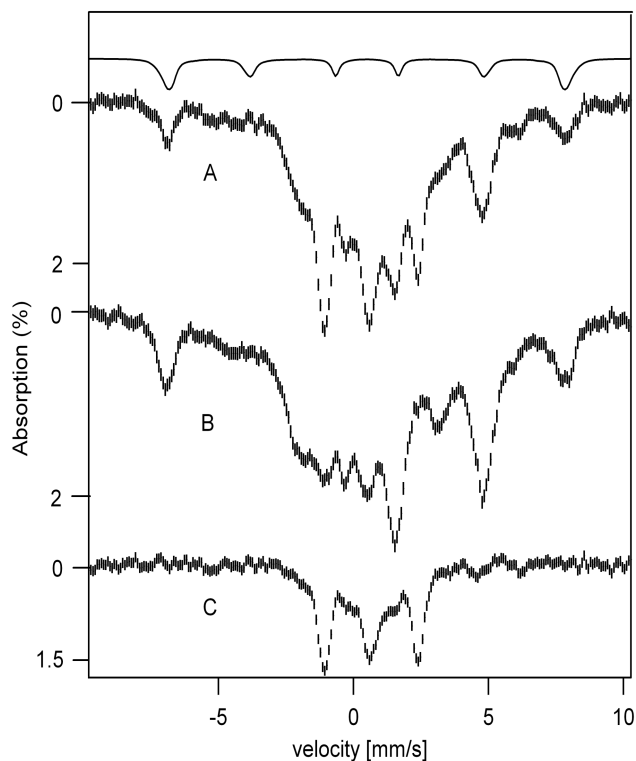

**Figure S4.** (A) 8.0 T/4.2 K Mössbauer spectrum of a sample containing the green intermediate (sample of Figure 6). The solid line drawn above the experimental spectrum is a simulation for a monomeric high-spin  $\text{Fe}^{\text{III}}$  contaminant (10% of Fe). (B) 8.0 T spectrum obtained after the sample of (A) was kept for 30 min at  $-30\text{ }^{\circ}\text{C}$  and then refrozen; this procedure led to ca. 90 % decay of the green intermediate. Roughly 50 % of the iron of the green intermediate decayed to a state essentially identical to the ferrous starting material, the remainder (10%) into high-spin  $\text{Fe}^{\text{III}}$  and into two not yet identified, poorly resolved species. We have prepared 8.0 T spectra of the green intermediate by subtracting a fraction of the spectrum of (B) from that of (A), cancelling essentially the contribution of the  $\text{Fe}^{\text{II}}$  and monomeric  $\text{Fe}^{\text{III}}$  species. This procedure led to spectrum (C), which is the same spectrum as that shown in Figure 6B (the shoulder at  $-2\text{ mm/s}$  reflects contributions from unidentified decay products).
